# Supplementary material for: Uptake of long-chain fatty acids from the bone marrow suppresses CD8+ T-cell metabolism and function in multiple myeloma
Source: PubMed Central journal article supplement — Blood Adv. 2023 Jun 7;7(20):6035–47. doi: 10.1182/bloodadvances.2023009890 (PMC10582277; doi:10.1182/bloodadvances.2023009890), 2023-06-07
Supplement: BLOODA_ADV-2023-009890-mmc1.pdf [file BLOODA_ADV-2023-009890-mmc1.pdf]

## Supplemental Methods

### Analysis of single cell RNA-Sequencing (scRNA-seq) Data

scRNA-seq data from BM samples of patients with MM (GSE186448)<sup>1</sup> were analysed using the scflow pipeline (<https://github.com/cribbbslab/scflow>). The kallisto/bustools workflow<sup>2</sup> was used to pseudoalign the reads, using a kmer size of 31 base pairs to the GRCh38 (hg38) reference transcriptome. The output was converted to a singleCellExperiment class object for initial filtering and then converted to a Seurat object for further downstream processing. Quality control and filtering was performed using a mitochondrial ratio cutoff of 0.1, fewer than 500 UMIs, or fewer than 300 or greater than 6000 features were removed. Clustering and sample integration were performed using Seurat (v4)<sup>3</sup>. Automated cell type annotation using singleR<sup>4</sup>, scClassify<sup>5</sup> and clustifyr<sup>6</sup> were used as a guide for manual annotation. Seurat's Wilcoxon approach was used for differential gene expression analysis.

Published scRNA-seq and associated CITE-seq data from two healthy control BM samples, obtained with donor consent from AllCells (GSE139369)<sup>7</sup> were analysed using scanpy 1.7.0<sup>8</sup>. CD3 protein-expressing bone marrow single-cells were processed to 7 clusters. Briefly, size factor-normalised log-transformed scaled highly variable genes were used to calculate principal components for neighbourhood graph construction, in turn used for leiden clustering<sup>9</sup> and UMAP calculation<sup>10</sup>. T cell phenotype was assigned to each cluster using canonical marker genes and surface expression.

**Table S1: General and Clinical Characteristics of Patients and Controls**

|                                            | Control    | MGUS            | Asymptomatic MM | MM at Diagnosis | MM on relapse   | MM in remission |
|--------------------------------------------|------------|-----------------|-----------------|-----------------|-----------------|-----------------|
| n                                          | 10         | 13              | 11              | 12              | 14              | 12              |
| Age – Median (Range)                       | 83 (44-97) | 65 (50-91)      | 72 (56-82)      | 74 (48-86)      | 65 (47-88)      | 73 (53-86)      |
| Sex - % male                               | 30         | 46              | 50              | 50              | 50              | 60              |
| <b>MMPC Abundance</b>                      |            |                 |                 |                 |                 |                 |
| Trephine % - Median (Range)                | N/A        | 5 (0-9)         | 16 (11-50)      | 55 (15-70)      | 40 (0-80)       | 5 (0-8)         |
| <b>Paraprotein (PP) Abundance and Type</b> |            |                 |                 |                 |                 |                 |
| PP level - Median (Range)                  | N/A        | 10.5 (2.0-16.0) | 20.5 (6.8-26.0) | 21.0 (0.0-51.6) | 14.0 (0.0-17.0) | 0.0 (0.0-4.0)   |
| IgG (%)                                    | N/A        | 66.7            | 85.7            | 88.9            | 92.8            | 58.3            |
| IgA (%)                                    | N/A        | 33.3            | 14.3            | 11.1            | 0               | 41.7            |
| Light Chain (%)                            | N/A        | 0               | 0               | 0               | 7.2             | 0               |

**Table S2: Treatment details for MM patients on relapse or in remission**

|                                   | MM on relapse | MM in remission |
|-----------------------------------|---------------|-----------------|
| Lines of therapy – Mean (Range)   | 1.7 (1-3)     | 1.3 (1-3)       |
| % Autologous stem-cell transplant | 57.1          | 33.3            |
| <b>Treatment at Sampling</b>      |               |                 |
| % Immunomodulatory Drug           | 50.0          | 91.7            |
| % Proteasome Inhibitor            | 78.6          | 66.6            |
| % Glucocorticoid                  | 92.9          | 83.3            |
| % Alkylating Agent                | 50.0          | 0.0             |
| % CD38-targeting agent            | 28.6          | 41.6            |

**Table S3: Details of flow cytometry antibodies**

| <b>Antibody</b>         | <b>Clone</b> | <b>Supplier and Cat #</b> |
|-------------------------|--------------|---------------------------|
| Anti-CD4 BV785          | OKT4         | Biolegend #317442         |
| Anti-CD8 AF700          | SK1          | Biolegend #344724         |
| Anti-CD56 BV510         | HDC56        | Biolegend #318340         |
| Anti-CD127 APC          | A019D5       | Biolegend #351342         |
| Anti-CD25 BV605         | BC96         | Biolegend #302632         |
| Anti-CD45RA BV421       | HI100        | Biolegend #304130         |
| Anti-CCR7 BUV373        | 2-L1-A       | BD #749676                |
| Anti -TIGIT BUV395      | 741182       | BD #747845                |
| Anti-PD1 PE-cy7         | EH12.2H7     | Biolegend #329918         |
| Anti-CD36 PE            | TR9          | Molecular probes A15777   |
| Anti-IFN- $\gamma$ FITC | B27          | Biolegend #506504         |
| Anti-TNF- $\alpha$ PE   | MAb11        | Biolegend #502909         |
| Anti-IL-2 BV605         | 1-17H12      | Biolegend #500332         |
| Anti-Granzyme B         | QA16A02      | Biolegend #372212         |
| Anti-COX IV AF647       | mAbcam339851 | Abcam ab197491            |
| Anti-VDAC unconjugated  | 2OB12AF2     | Abcam ab14734             |
| Goat-anti-mouse PE-cy7  | Poly4053     | Biolegend #405315         |

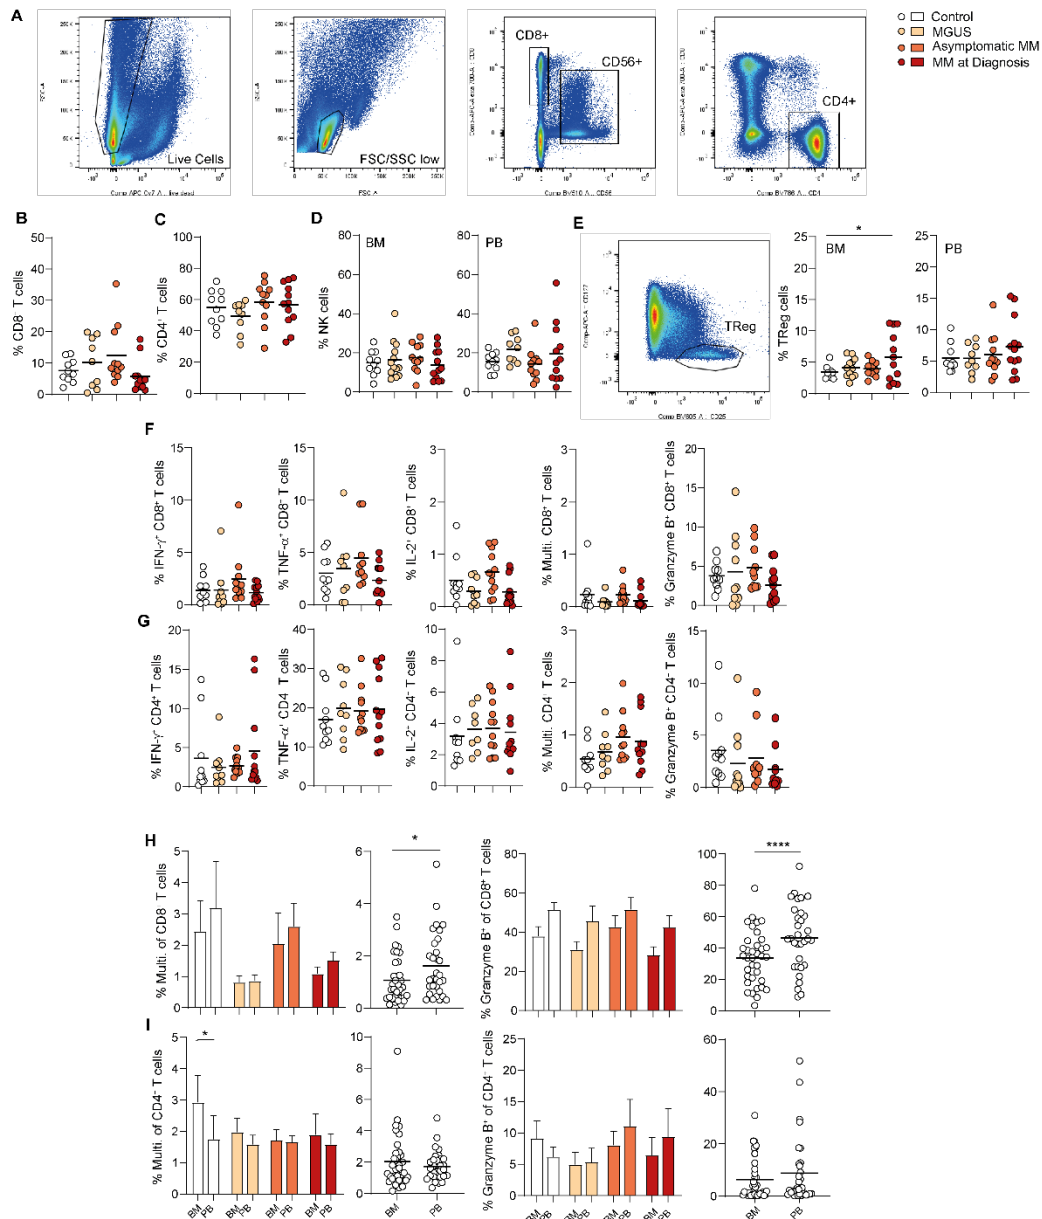

**Supplementary Figure 1:**

(A) Representative dot plots show cell population gates for CD4<sup>+</sup> and CD8<sup>+</sup> T cells, and CD56<sup>+</sup> NK cells within BM and PB live FSC/SSC low cells. (B-C) Graphs show percentage of (B) CD8<sup>+</sup> and (C) CD4<sup>+</sup> T cells in PB mononuclear cells from controls (n=10), individuals with MGUS (n=13), asymptomatic MM (Asympt. n=11) or MM at diagnosis (Diagnosis n=12). (D) Proportions of CD56<sup>+</sup> NK cells in BM and PB mononuclear cells from each group as indicated. (E) Representative dot plots show cell population gate for CD4<sup>+</sup>CD127<sup>+</sup>CD25<sup>+</sup> TReg cells. Proportion of CD4<sup>+</sup>CD127<sup>+</sup>CD25<sup>+</sup> TReg cells in BM and PB mononuclear cells from each group as indicated. (F-G) Proportion of PB FSC/SSC low cells from indicated groups expressing (F) CD8 or (G) CD4 and IFN- $\gamma$ , TNF- $\alpha$ , IL-2, all three cytokines (Multifunctional) or Granzyme B as indicated, after 4 hours stimulation via CD3/CD28 in presence of brefeldin A. (H-I) Proportion of (H) CD8<sup>+</sup> and (I) CD4<sup>+</sup> T cells within BM or PB mononuclear cells from indicated groups expressing IFN- $\gamma$ , TNF- $\alpha$  and IL-2 (Multifunctional) or Granzyme B after 4 hours stimulation as in (F-G). Proportions within the BM and PB are directly compared for each group individually and for all patients combined. Significance was calculated using (B-G) one-way or (H-I bars) two-way ANOVA and Sidak's multiple comparison tests or (H-I circles) paired t test; \*p<0.05, \*\*p < 0.01, \*\*\*p < 0.0001.

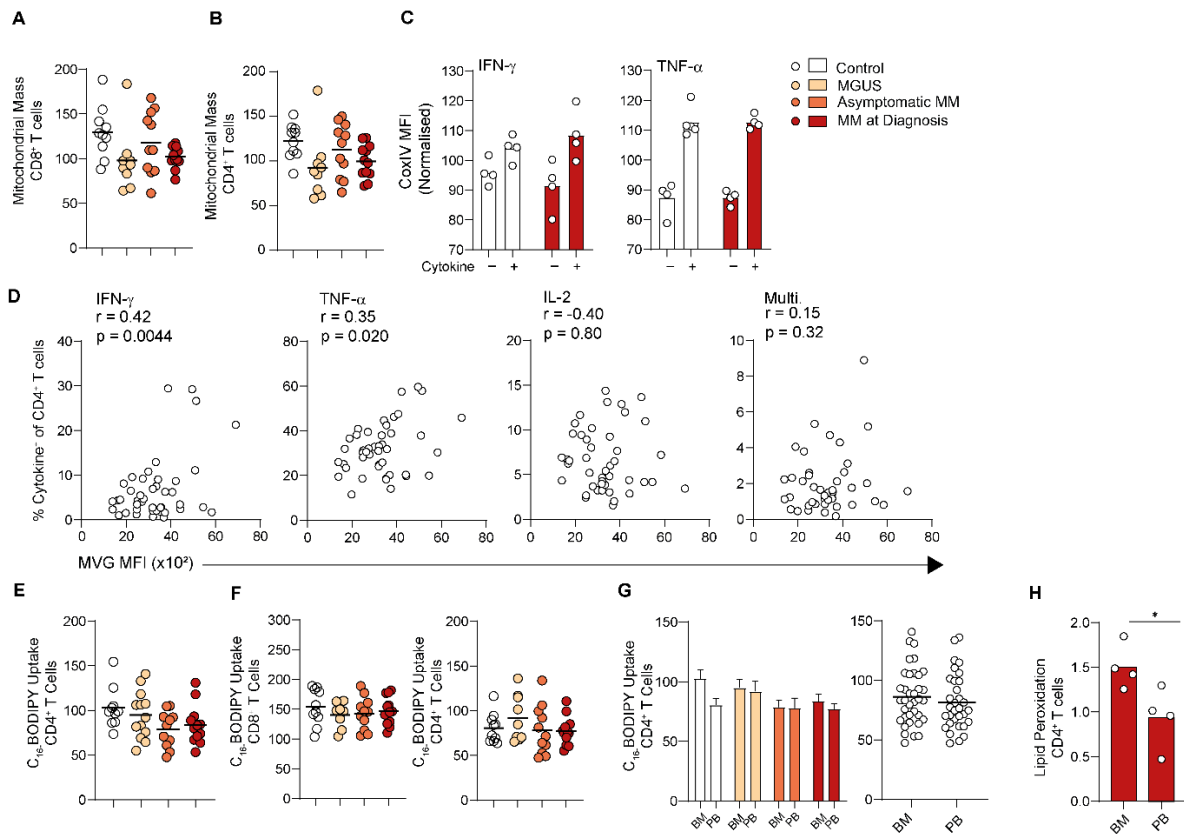

**Supplementary Figure 2:**

(A-B) Mitochondrial mass of (A) CD8<sup>+</sup> and (B) CD4<sup>+</sup> T cells PB mononuclear cells from controls (n=10), individuals with MGUS (n=13), asymptomatic MM (Asympt. n=11) or MM at diagnosis (Diagnosis n=12) assessed using mitoview green. (C) CoxIV MFI of CD4<sup>+</sup> T cells positive or negative for IFN- $\gamma$  or TNF- $\alpha$  as indicated from control (n=4) or MM at diagnosis (n=4) samples. (D) Correlation of mitochondrial mass (MVG fluorescence) with frequency of BM CD4<sup>+</sup> T cells positive (+) for the indicated cytokines for all patient samples combined. (E-F) C<sub>16</sub>-BODIPY uptake of (E) BM CD4<sup>+</sup> T cells, (F) PB CD8<sup>+</sup> and PB CD4<sup>+</sup> T cells within indicated groups. (G) C<sub>16</sub>-BODIPY uptake of BM and PB CD4<sup>+</sup> T cells are directly compared for each group and for all patient samples combined. (H) Lipid peroxidation capacity of CD4<sup>+</sup> T cells within BM and PB mononuclear cells from MM patients at diagnosis (n=4), assessed using the lipid peroxidation probe Bodipy 581/591. Significance was calculated using (A-B, E-F) one-way or (C, G bars) two-way ANOVA and Sidak's multiple comparisons test, (D) Pearson's correlation (G circles, H) paired t test, \* $p < 0.05$ , \*\* $p < 0.01$ , \*\*\* $p < 0.0001$ .

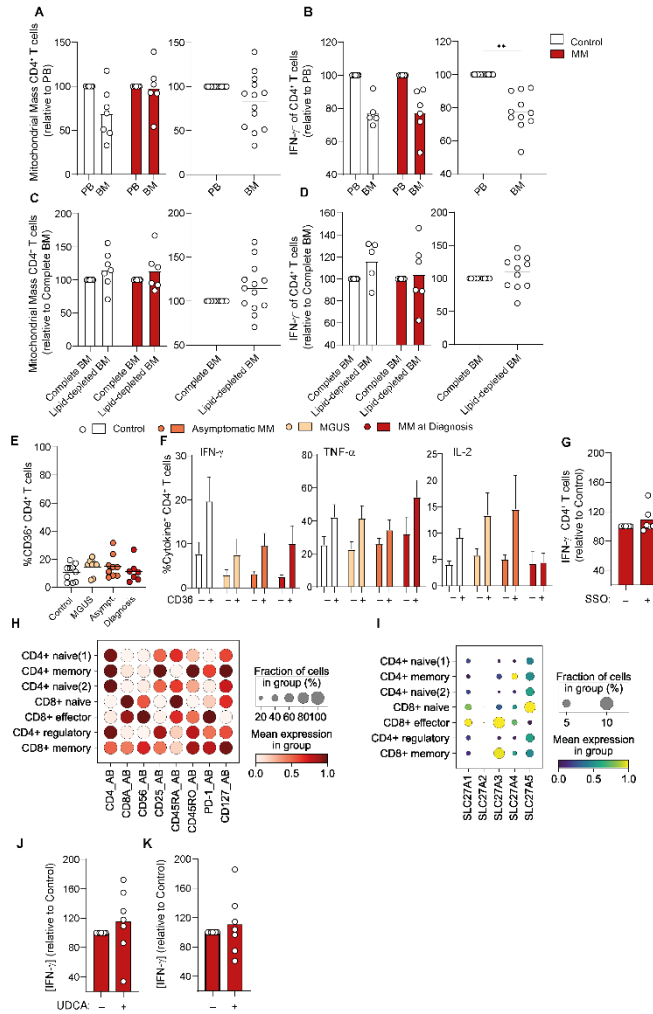

### Supplementary Figure 3:

(A-B) BM mononuclear cells from controls (n=6) or relapsed MM patients (n=6) were cultured in autologous PB or BM plasma as indicated for 72 hours. (A) CD4<sup>+</sup> T cell mitochondrial mass was assessed by flow cytometry using mitoview green and is shown for each group (left) and both combined (right). (B) At 72 hours T cells were activated with PMA/ionomycin and expression of IFN- $\gamma$  was assessed within CD4<sup>+</sup> T cells by flow cytometry. (C-D) BM mononuclear cells were cultured and assessed as in (A-B) but in either complete or lipid-depleted BM autologous plasma as indicated. (E) Proportion of CD4<sup>+</sup> T cells expressing CD36 within controls (n=10), individuals with MGUS (n=8), asymptomatic MM (Asympt. n=9) or MM at diagnosis (Diagnosis n=7) were assessed by flow cytometry. (F) Expression of IFN- $\gamma$ , TNF- $\alpha$  and IL-2 by CD36 positive and negative CD4<sup>+</sup> T cells within indicated BM mononuclear cell samples. (G) BM mononuclear cells from MM patients at diagnosis (n=7) were cultured in autologous BM plasma as in (A-D), in absence or presence of the CD36 inhibitor, SSO and assessed for IFN- $\gamma$  expression within CD4<sup>+</sup> T cells by flow cytometry. (H-I) Dot plots demonstrating (H) phenotypic T cell cluster allocation by indicated protein expression and (I) SLC27A1-5 gene expression within indicated T cell clusters from CITE-Seq data of two healthy control BM samples. (J-K) BM mononuclear cells from MM patients at diagnosis (n=7) were cultured in autologous PB (J) or BM (K) plasma as in (A-D), in absence or presence of the FATP5 inhibitor UDCA and assessed for IFN- $\gamma$  expression by ELISA. Significance was calculated using (A-D circles, G, J-K) Wilcoxon matched-pairs signed rank test; \*\*p < 0.01, \*\*\*p < 0.0001.

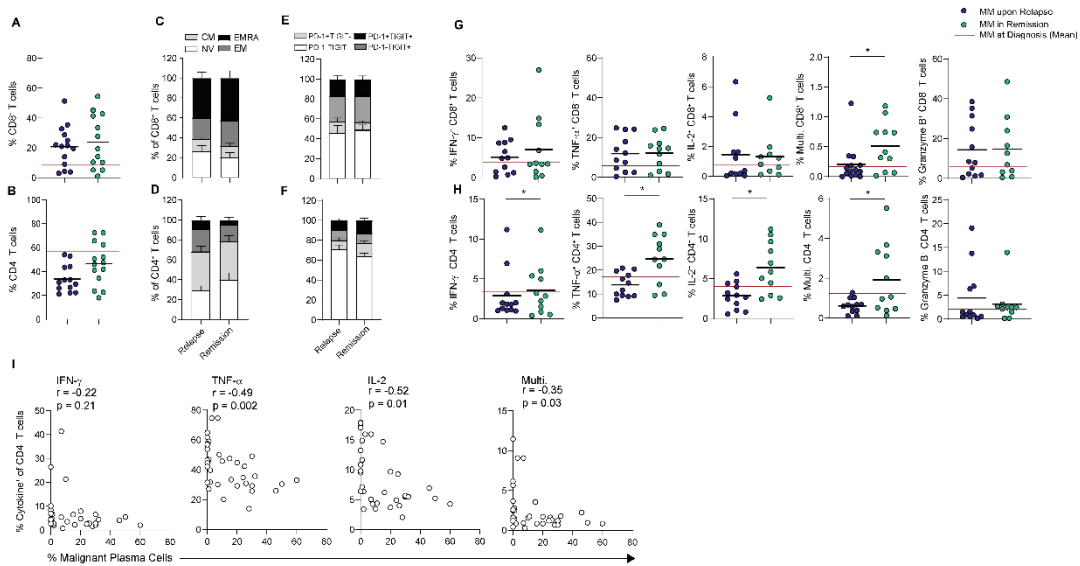

**Supplementary Figure 4:**

(A-B) Proportion of (A) CD8<sup>+</sup> and (B) CD4<sup>+</sup> T cells within PB mononuclear cells from relapsed MM patients (n=14) and MM patients in remission (n=12). (C-D) Proportions of NV, CM, EM and EMRA (C) CD8<sup>+</sup> and (D) CD4<sup>+</sup> T cells in indicated PB samples. (E-F) Percentage of PD-1<sup>-</sup>TIGIT<sup>-</sup>, PD-1<sup>+</sup>TIGIT<sup>-</sup>, PD-1<sup>-</sup>TIGIT<sup>+</sup> and PD-1<sup>+</sup>TIGIT<sup>+</sup> (E) CD8<sup>+</sup> and (F) CD4<sup>+</sup> T cells in PB mononuclear cells from indicated samples. (G-H) Proportion of (G) CD8<sup>+</sup> and (H) CD4<sup>+</sup> T cells within PB mononuclear cells from each group expressing IFN- $\gamma$ , TNF- $\alpha$ , IL-2, all three of these cytokines (Multifunctional) or Granzyme B after 4 hours of stimulation via CD3/CD28 brefeldin A. (I) Correlation of percentage of malignant plasma cells within the BM sample with frequency of BM CD4<sup>+</sup> T cells positive (+) for the indicated cytokines for samples combined for patients with MM at diagnosis (n=12), relapsed MM patients (n=14) and MM patients in remission (n=12). Significance was calculated using (A-B, G-H) unpaired t test and (I) Pearson correlation; \*p<0.05.

1. Kurata K, James-Bott A, Tye MA, et al. Prolyl-tRNA synthetase as a novel therapeutic target in multiple myeloma. *Blood Cancer J.* 2023;13(1):1–12.
2. Melsted P, Boeshaghi AS, Liu L, et al. Modular, efficient and constant-memory single-cell RNA-seq preprocessing. *Nat Biotechnol.* 2021;39(7):813–818.
3. Hao Y, Hao S, Andersen-Nissen E, et al. Integrated analysis of multimodal single-cell data. *Cell.* 2021;184(13):3573-3587.e29.
4. Aran D, Looney AP, Liu L, et al. Reference-based analysis of lung single-cell sequencing reveals a transitional profibrotic macrophage. *Nat Immunol.* 2019;20(2):163–172.
5. scClassify: sample size estimation and multiscale classification of cells using single and multiple reference. *Molecular Systems Biology.* 2020;16(6):e9389.
6. Fu R, Gillen AE, Sheridan RM, et al. clustifyr: an R package for automated single-cell RNA sequencing cluster classification. 2020;
7. Granja JM, Klemm S, McGinnis LM, et al. Single-cell multiomic analysis identifies regulatory programs in mixed-phenotype acute leukemia. *Nat Biotechnol.* 2019;37(12):1458–1465.
8. Wolf FA, Angerer P, Theis FJ. SCANPY: large-scale single-cell gene expression data analysis. *Genome Biology.* 2018;19(1):15.

9. Traag VA, Waltman L, van Eck NJ. From Louvain to Leiden: guaranteeing well-connected communities. *Sci Rep.* 2019;9(1):5233.
10. McInnes L, Healy J, Melville J. UMAP: Uniform Manifold Approximation and Projection for Dimension Reduction. 2020;
